# Supplementary material for: Anion⋯anion interaction within Ch(CH3)X4−(Ch = S, Se, Te; X = Cl, Br, I) dimers stabilized by chalcogen bonds
Source: Royal Society of Chemistry journal article supplement (doi:10.1039/d2cp00271j), 2022-01-01
Supplement: d2cp00271j1.pdf [file d2cp00271j1.pdf]

## SUPPLEMENTARY INFORMATION

### Anion...anion interaction within $\text{Ch}(\text{CH}_3)\text{X}_4^-$ (Ch = S, Se, Te; X=Cl, Br, I) dimers stabilized by chalcogen bonds

Rafał Wysockiński

| CSD<br>refcod | Ch...X<br>[Å]    | structures                                                                           |
|---------------|------------------|--------------------------------------------------------------------------------------|
| YALRIM        | Te...F<br>3.208  | 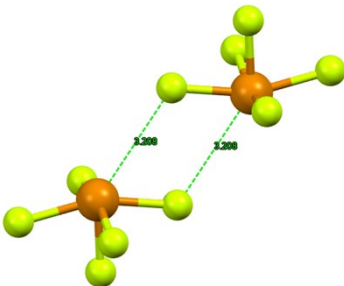  |
| WAMNON        | Te...F<br>3.231  |  |
| JUCDAM        | Te...Cl<br>3.241 |  |

|        |                  |                                                                                                                                                                                                                                                                                                                                         |
|--------|------------------|-----------------------------------------------------------------------------------------------------------------------------------------------------------------------------------------------------------------------------------------------------------------------------------------------------------------------------------------|
| CITMAT | Te...Cl<br>3.423 | 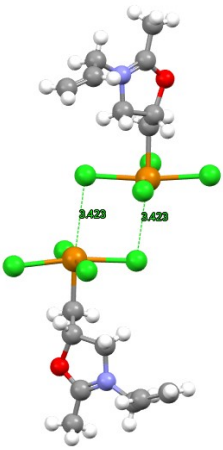 <p>ORTEP diagram of CITMAT showing the Te...Cl interaction. The distance is 3.423 Å. The structure features a central Te atom coordinated to two Cl atoms and two other ligands, with a benzene ring and a nitrogen-containing group attached.</p>   |
| WUTJOK | Te...Cl<br>3.597 |  <p>ORTEP diagram of WUTJOK showing the Te...Cl interaction. The distance is 3.597 Å. The structure features a central Te atom coordinated to two Cl atoms and two other ligands, with two benzene rings attached.</p>                               |
| CIFVOD | Te...Cl<br>3.615 |  <p>ORTEP diagram of CIFVOD showing the Te...Cl interaction. The distance is 3.615 Å. The structure features a central Te atom coordinated to two Cl atoms and two other ligands, with a benzene ring and a nitrogen-containing group attached.</p> |

|        |                  |                                                                                                                                                                                                                                                                                                         |
|--------|------------------|---------------------------------------------------------------------------------------------------------------------------------------------------------------------------------------------------------------------------------------------------------------------------------------------------------|
| CUCGOW | Te...Cl<br>3.619 | 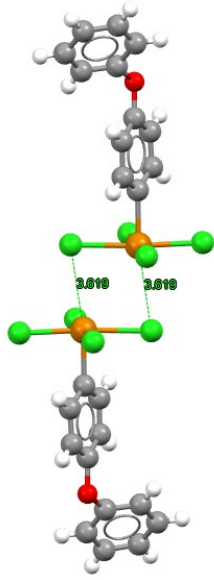 <p>ORTEP diagram of the CUCGOW structure. The central Te atom (orange) is coordinated to two Cl atoms (green) and two benzene rings (grey and white). The Te...Cl interaction distance is labeled as 3.619 Å.</p>    |
| ELAVAP | Te...Br<br>3.600 |  <p>ORTEP diagram of the ELAVAP structure. The central Te atom (orange) is coordinated to two Br atoms (orange) and two benzene rings (grey and white). The Te...Br interaction distance is labeled as 3.600 Å.</p>  |
| CIFVUJ | Te...Br<br>3.684 |  <p>ORTEP diagram of the CIFVUJ structure. The central Te atom (orange) is coordinated to two Br atoms (orange) and two benzene rings (grey and white). The Te...Br interaction distance is labeled as 3.684 Å.</p> |

|        |                 |                                                                                                                                                                                                                                                                                                                                                                     |
|--------|-----------------|---------------------------------------------------------------------------------------------------------------------------------------------------------------------------------------------------------------------------------------------------------------------------------------------------------------------------------------------------------------------|
| CIFWAQ | Te...I<br>3.827 | 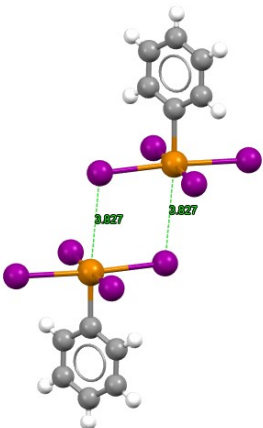 <p>ORTEP diagram of CIFWAQ showing the Te...I interaction. The Te atom (orange) is coordinated to four I atoms (purple) in a distorted tetrahedral geometry. Two phenyl rings (grey and white) are coordinated to the Te atom. The Te...I interaction distance is 3.827 Å.</p>   |
| MTEMTE | Te...I<br>3.880 |  <p>ORTEP diagram of MTEMTE showing the Te...I interaction. The Te atom (orange) is coordinated to four I atoms (purple) in a distorted tetrahedral geometry. A phenyl ring (grey and white) is coordinated to the Te atom. The Te...I interaction distance is 3.880 Å.</p>      |
| ECOQIY | Te...I<br>3.890 |  <p>ORTEP diagram of ECOQIY showing the Te...I interaction. The Te atom (orange) is coordinated to four I atoms (purple) in a distorted tetrahedral geometry. Two phenyl rings (grey and white) are coordinated to the Te atom. The Te...I interaction distance is 3.890 Å.</p> |

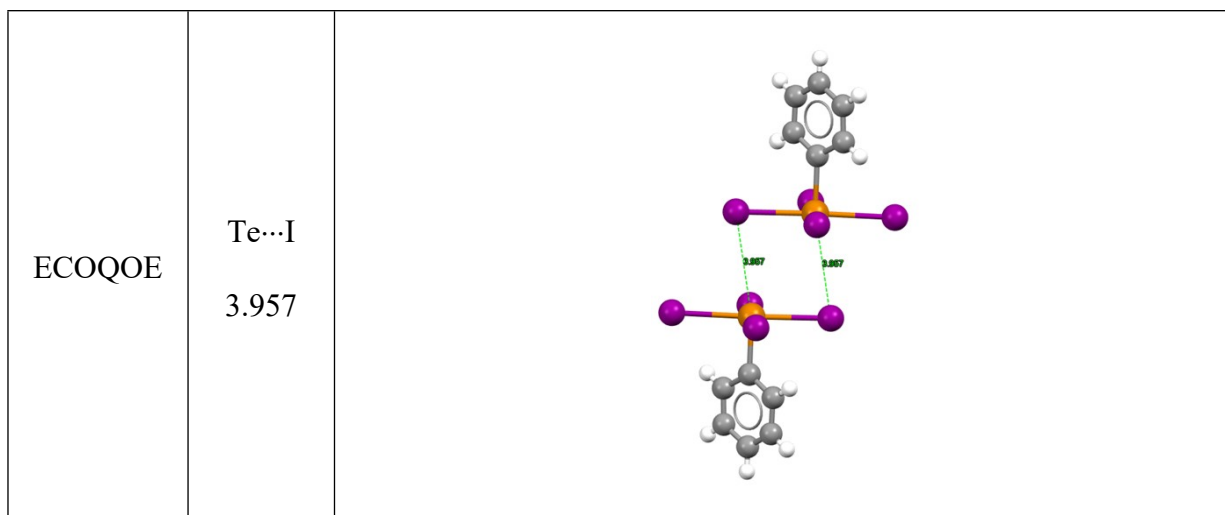

Fig. S1. Examples drawn from the CSD database.

### Monomers

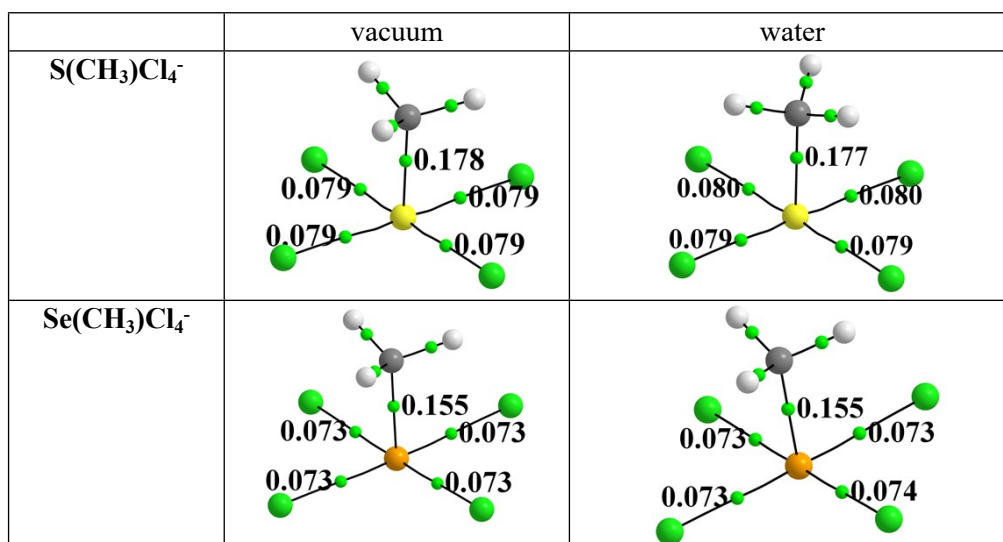

|                                       |                                                                                     |                                                                                      |
|---------------------------------------|-------------------------------------------------------------------------------------|--------------------------------------------------------------------------------------|
| $\text{Te}(\text{CH}_3)\text{Cl}_4^-$ | 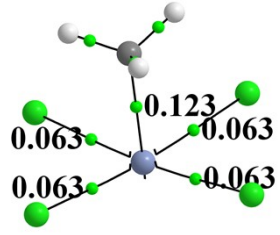   |    |
| $\text{S}(\text{CH}_3)\text{Br}_4^-$  |    |    |
| $\text{Se}(\text{CH}_3)\text{Br}_4^-$ |    |    |
| $\text{Te}(\text{CH}_3)\text{Br}_4^-$ |  |  |
| $\text{S}(\text{CH}_3)\text{I}_4^-$   |  |  |
| $\text{Se}(\text{CH}_3)\text{I}_4^-$  |  |  |

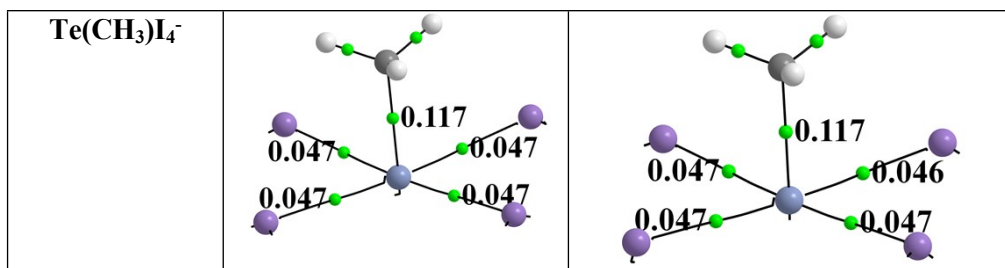

Fig. S2. AIM molecular diagrams of MP2/aug-cc-pVDZ optimized complexes. Green dots represent bond critical points. Numbers refers to electron densities at BCPs (in au)

Table S1. Relative difference in dimers total energy (kcal/mol)<sup>a</sup> in vacuum and water solvent

|                                       | water | vacuum          |
|---------------------------------------|-------|-----------------|
| $\text{S}(\text{CH}_3)\text{Cl}_4^-$  | 0.00  | -               |
| $\text{Se}(\text{CH}_3)\text{Cl}_4^-$ | 0.00  | 150.24 (147.98) |
| $\text{Te}(\text{CH}_3)\text{Cl}_4^-$ | 0.00  | 143.83 (141.04) |
|                                       |       |                 |
| $\text{S}(\text{CH}_3)\text{Br}_4^-$  | 0.00  | 144.05 (140.86) |
| $\text{Se}(\text{CH}_3)\text{Br}_4^-$ | 0.00  | 141.92 (140.15) |
| $\text{Te}(\text{CH}_3)\text{Br}_4^-$ | 0.00  | 136.43 (134.40) |
|                                       |       |                 |
| $\text{S}(\text{CH}_3)\text{I}_4^-$   | 0.00  | 130.90 (129.52) |
| $\text{Se}(\text{CH}_3)\text{I}_4^-$  | 0.00  | 129.61 (128.01) |
| $\text{Te}(\text{CH}_3)\text{I}_4^-$  | 0.00  | 126.35 (123.65) |

<sup>a</sup> Gibbs free energy differences in parentheses.

Tab. S2. AIM descriptors of the calculated complexes in vacuum. Bond critical point (BCP) properties: electron density  $\rho$ , Laplacian of electron density  $\nabla^2\rho$  and total electron energy H and potential electron density energy V as well as kinetic electron density energy G, were obtained at the MP2/ aug-cc-pVDZ level. Data in atomic units.

|                                       | interaction | $\rho$ | $\nabla^2\rho$ | H      | V      | G      |
|---------------------------------------|-------------|--------|----------------|--------|--------|--------|
|                                       | vacuum      |        |                |        |        |        |
| $\text{S}(\text{CH}_3)\text{Cl}_4^-$  | S-Cl        | 0.079  | +0.067         | -0.023 | -0.063 | +0.040 |
|                                       | S-C         | 0.178  | -0.314         | -0.129 | -0.180 | +0.051 |
| $\text{Se}(\text{CH}_3)\text{Cl}_4^-$ | Se-Cl       | 0.073  | +0.066         | -0.021 | -0.059 | +0.038 |
|                                       | Se-C        | 0.155  | -0.232         | -0.106 | -0.154 | +0.048 |
| $\text{Te}(\text{CH}_3)\text{Cl}_4^-$ | Te-Cl       | 0.063  | +0.080         | -0.017 | -0.053 | +0.036 |
|                                       | Te-C        | 0.123  | -0.043         | -0.070 | -0.129 | +0.059 |
|                                       |             |        |                |        |        |        |
| $\text{S}(\text{CH}_3)\text{Br}_4^-$  | S-Br        | 0.066  | +0.062         | -0.015 | -0.046 | +0.031 |

|                                                     |       |       |        |        |        |        |
|-----------------------------------------------------|-------|-------|--------|--------|--------|--------|
|                                                     | S-C   | 0.174 | -0.299 | -0.125 | -0.175 | +0.050 |
| <b>Se(CH<sub>3</sub>)Br<sub>4</sub><sup>-</sup></b> | Se-Br | 0.063 | +0.051 | -0.015 | -0.043 | +0.028 |
|                                                     | Se-C  | 0.151 | -0.215 | -0.102 | -0.150 | +0.048 |
| <b>Te(CH<sub>3</sub>)Br<sub>4</sub><sup>-</sup></b> | Te-Br | 0.056 | +0.051 | -0.014 | -0.040 | +0.026 |
|                                                     | Te-C  | 0.121 | -0.040 | -0.068 | -0.125 | +0.058 |
|                                                     |       |       |        |        |        |        |
| <b>S(CH<sub>3</sub>)I<sub>4</sub><sup>-</sup></b>   | S-I   | 0.051 | +0.051 | -0.009 | -0.031 | +0.022 |
|                                                     | S-C   | 0.169 | -0.279 | -0.119 | -0.169 | +0.050 |
| <b>Se(CH<sub>3</sub>)I<sub>4</sub><sup>-</sup></b>  | Se-I  | 0.051 | +0.040 | -0.010 | -0.030 | +0.020 |
|                                                     | Se-C  | 0.146 | -0.193 | -0.096 | -0.144 | +0.048 |
| <b>Te(CH<sub>3</sub>)I<sub>4</sub><sup>-</sup></b>  | Te-I  | 0.047 | +0.031 | -0.010 | -0.028 | +0.018 |
|                                                     | Te-C  | 0.117 | -0.032 | -0.064 | -0.120 | +0.056 |
|                                                     | water |       |        |        |        |        |
| <b>S(CH<sub>3</sub>)Cl<sub>4</sub><sup>-</sup></b>  | S-Cl  | 0.080 | +0.067 | -0.024 | -0.064 | +0.040 |
|                                                     | S-C   | 0.177 | -0.303 | -0.127 | -0.179 | +0.052 |
| <b>Se(CH<sub>3</sub>)Cl<sub>4</sub><sup>-</sup></b> | Se-Cl | 0.074 | +0.066 | -0.021 | -0.059 | +0.038 |
|                                                     | Se-C  | 0.155 | -0.234 | -0.105 | -0.152 | +0.047 |
| <b>Te(CH<sub>3</sub>)Cl<sub>4</sub><sup>-</sup></b> | Te-Cl | 0.063 | +0.080 | -0.016 | -0.052 | +0.036 |
|                                                     | Te-C  | 0.124 | -0.054 | -0.071 | -0.128 | +0.057 |
|                                                     |       |       |        |        |        |        |
| <b>S(CH<sub>3</sub>)Br<sub>4</sub><sup>-</sup></b>  | S-Br  | 0.067 | +0.061 | -0.016 | -0.047 | +0.031 |
|                                                     | S-C   | 0.173 | -0.290 | -0.123 | -0.174 | +0.051 |
| <b>Se(CH<sub>3</sub>)Br<sub>4</sub><sup>-</sup></b> | Se-Br | 0.064 | +0.051 | -0.016 | -0.044 | +0.028 |
|                                                     | Se-C  | 0.151 | -0.218 | -0.101 | -0.148 | +0.047 |
| <b>Te(CH<sub>3</sub>)Br<sub>4</sub><sup>-</sup></b> | Te-Br | 0.056 | +0.052 | -0.013 | -0.040 | +0.026 |
|                                                     | Te-C  | 0.121 | -0.049 | -0.068 | -0.125 | +0.056 |
|                                                     |       |       |        |        |        |        |
| <b>S(CH<sub>3</sub>)I<sub>4</sub><sup>-</sup></b>   | S-I   | 0.052 | +0.051 | -0.009 | -0.032 | +0.022 |
|                                                     | S-C   | 0.168 | -0.274 | -0.118 | -0.168 | +0.050 |
| <b>Se(CH<sub>3</sub>)I<sub>4</sub><sup>-</sup></b>  | Se-I  | 0.051 | +0.040 | -0.010 | -0.030 | +0.020 |
|                                                     | Se-C  | 0.146 | -0.197 | -0.096 | -0.143 | +0.047 |
| <b>Te(CH<sub>3</sub>)I<sub>4</sub><sup>-</sup></b>  | Te-I  | 0.047 | +0.031 | -0.010 | -0.028 | +0.018 |
|                                                     | Te-C  | 0.117 | -0.039 | -0.065 | -0.120 | +0.055 |

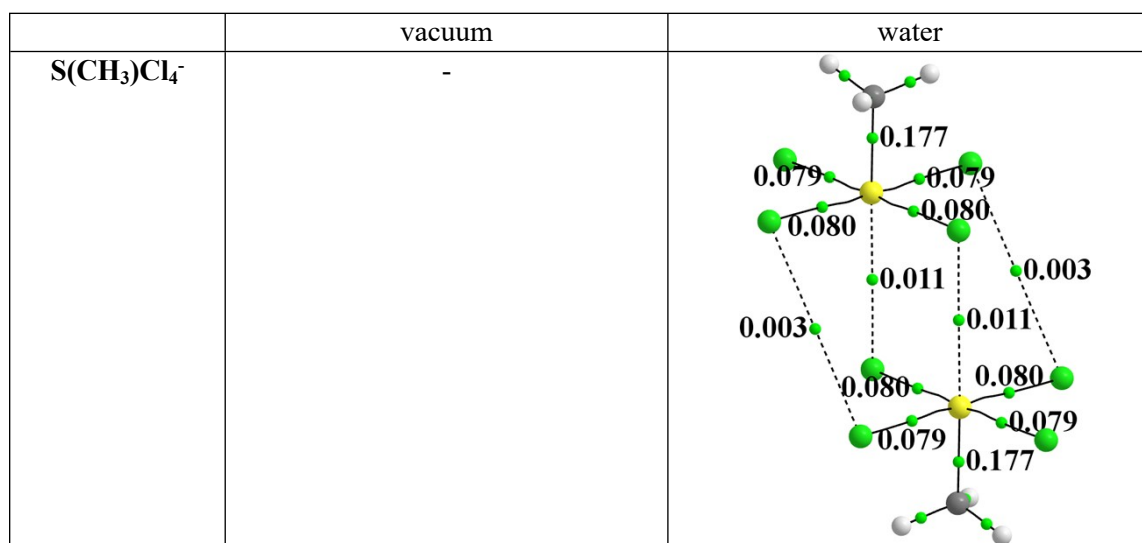



|                                                         |                                                                                     |                                                                                      |
|---------------------------------------------------------|-------------------------------------------------------------------------------------|--------------------------------------------------------------------------------------|
| <p><math>\text{Se}(\text{CH}_3)\text{Cl}_4^-</math></p> | 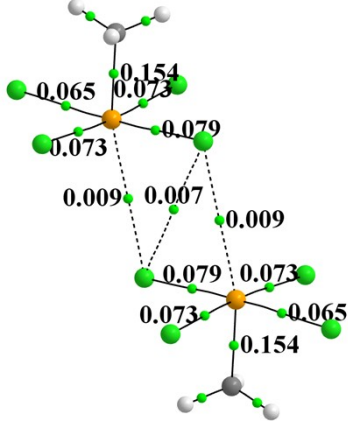   |    |
| <p><math>\text{Te}(\text{CH}_3)\text{Cl}_4^-</math></p> |   |  |
| <p><math>\text{S}(\text{CH}_3)\text{Br}_4^-</math></p>  |  |  |
| <p><math>\text{Se}(\text{CH}_3)\text{Br}_4^-</math></p> |  |  |

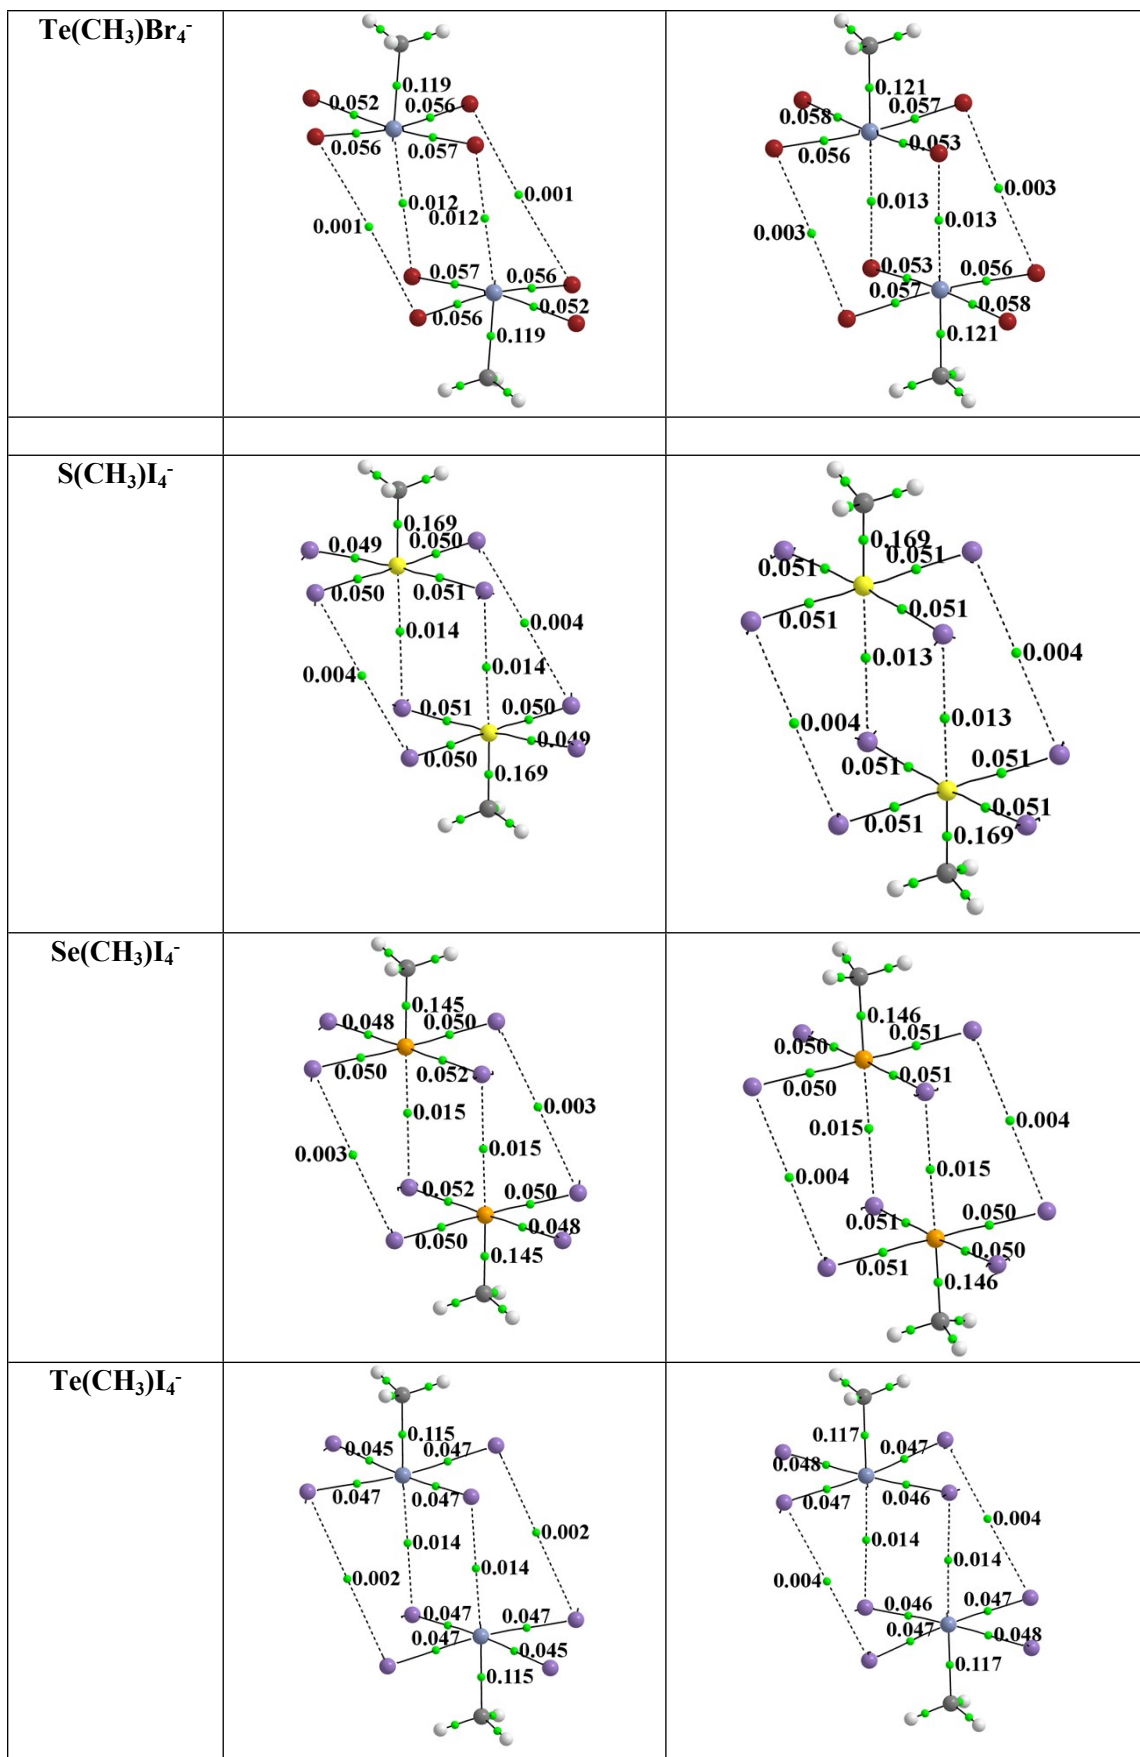

Fig. S3. AIM molecular diagrams of MP2/aug-cc-pVDZ optimized complexes. Green dots represent bond critical points. Numbers refers to electron densities at BCPs (in au)

Tab. S3. AIM descriptors of the calculated complexes in acetone. Bond critical point (BCP) properties: electron density  $\rho$ , Laplacian of electron density  $\nabla^2\rho$  and total electron energy H and potential electron density energy V as well as kinetic electron density energy G, were obtained at the MP2/ aug-cc-pVDZ level. Data in atomic units.

|                                                       | interaction | $\rho$ | $\nabla^2\rho$ | H      | V      | G      |
|-------------------------------------------------------|-------------|--------|----------------|--------|--------|--------|
| vacuum                                                |             |        |                |        |        |        |
| <b>(S(CH<sub>3</sub>)Cl<sub>4</sub>)<sub>2</sub></b>  | -           | -      | -              | -      | -      | -      |
| <b>(Se(CH<sub>3</sub>)Cl<sub>4</sub>)<sub>2</sub></b> | Se-Cl       | 0.078  | +0.058         | -0.025 | -0.065 | +0.040 |
|                                                       | Se-C        | 0.154  | -0.228         | -0.105 | -0.153 | +0.048 |
|                                                       | Se...Cl     | 0.009  | +0.027         | +0.001 | -0.005 | +0.006 |
|                                                       | Cl...Cl     | 0.007  | +0.019         | +0.000 | -0.004 | +0.004 |
| <b>(Te(CH<sub>3</sub>)Cl<sub>4</sub>)<sub>2</sub></b> | Te-Cl       | 0.065  | +0.080         | +0.018 | -0.055 | +0.038 |
|                                                       | Te-C        | 0.122  | -0.037         | +0.069 | -0.128 | +0.059 |
|                                                       | Te...Cl     | 0.009  | +0.023         | +0.001 | -0.004 | +0.005 |
|                                                       | Cl...Cl     | 0.005  | +0.014         | +0.000 | -0.003 | +0.003 |
| vacuum                                                |             |        |                |        |        |        |
| <b>(S(CH<sub>3</sub>)Br<sub>4</sub>)<sub>2</sub></b>  | S-Br        | 0.069  | +0.059         | -0.017 | -0.049 | +0.032 |
|                                                       | S-C         | 0.174  | -0.302         | -0.125 | -0.174 | +0.049 |
|                                                       | S...Br      | 0.012  | +0.034         | +0.001 | -0.006 | +0.007 |
|                                                       | Br...Br     | 0.002  | +0.005         | +0.000 | -0.001 | +0.001 |
| <b>(Se(CH<sub>3</sub>)Br<sub>4</sub>)<sub>2</sub></b> | Se-Br       | 0.066  | +0.048         | -0.017 | -0.046 | +0.029 |
|                                                       | Se-C        | 0.150  | -0.211         | -0.101 | -0.150 | +0.048 |
|                                                       | Se...Br     | 0.013  | +0.034         | +0.001 | -0.006 | +0.007 |
|                                                       | Br...Br     | 0.002  | +0.004         | +0.000 | -0.001 | +0.001 |
| <b>(Te(CH<sub>3</sub>)Br<sub>4</sub>)<sub>2</sub></b> | Te-Br       | 0.057  | +0.050         | -0.014 | -0.041 | +0.027 |
|                                                       | Te-C        | 0.119  | -0.033         | -0.066 | -0.124 | +0.058 |
|                                                       | Te...Br     | 0.012  | +0.027         | +0.001 | -0.005 | +0.006 |
|                                                       | Br...Br     | 0.001  | +0.002         | +0.000 | -0.000 | +0.000 |
| vacuum                                                |             |        |                |        |        |        |
| <b>(S(CH<sub>3</sub>)I<sub>4</sub>)<sub>2</sub></b>   | S-I         | 0.051  | +0.053         | -0.009 | -0.031 | +0.022 |
|                                                       | S-C         | 0.169  | -0.282         | -0.119 | -0.168 | +0.049 |
|                                                       | S...I       | 0.014  | +0.034         | +0.001 | -0.007 | +0.008 |
|                                                       | I...I       | 0.004  | +0.008         | +0.000 | -0.001 | +0.002 |
| <b>(Se(CH<sub>3</sub>)I<sub>4</sub>)<sub>2</sub></b>  | Se-I        | 0.052  | +0.040         | -0.011 | -0.031 | +0.021 |
|                                                       | Se-C        | 0.145  | -0.185         | -0.095 | -0.144 | +0.049 |
|                                                       | Se...I      | 0.015  | +0.034         | +0.001 | -0.007 | +0.008 |
|                                                       | I...I       | 0.003  | +0.006         | +0.000 | -0.001 | +0.001 |
| <b>(Te(CH<sub>3</sub>)I<sub>4</sub>)<sub>2</sub></b>  | Te-I        | 0.047  | +0.031         | -0.010 | -0.028 | +0.018 |
|                                                       | Te-C        | 0.115  | -0.023         | -0.062 | -0.119 | +0.056 |
|                                                       | Te...I      | 0.014  | +0.028         | +0.000 | -0.006 | +0.007 |
|                                                       | I...I       | 0.002  | +0.004         | +0.000 | -0.001 | +0.001 |
| water                                                 |             |        |                |        |        |        |
| <b>(S(CH<sub>3</sub>)Cl<sub>4</sub>)<sub>2</sub></b>  | S-Cl        | 0.080  | +0.069         | -0.023 | -0.064 | +0.041 |
|                                                       | S-C         | 0.177  | -0.307         | -0.128 | -0.179 | +0.051 |
|                                                       | S...Cl      | 0.011  | +0.034         | +0.001 | -0.006 | +0.007 |
|                                                       | Cl...Cl     | 0.003  | +0.007         | +0.000 | -0.001 | +0.002 |
| <b>(Se(CH<sub>3</sub>)Cl<sub>4</sub>)<sub>2</sub></b> | Se-Cl       | 0.075  | +0.064         | -0.022 | -0.060 | +0.038 |
|                                                       | Se-C        | 0.155  | -0.235         | -0.106 | -0.153 | +0.047 |
|                                                       | Se...Cl     | 0.013  | +0.037         | +0.001 | -0.007 | +0.008 |
|                                                       | Cl...Cl     | 0.003  | +0.008         | +0.000 | -0.001 | +0.002 |

|                                                                   |         |       |        |        |        |        |
|-------------------------------------------------------------------|---------|-------|--------|--------|--------|--------|
| <b>(Te(CH<sub>3</sub>)Cl<sub>4</sub><sup>-</sup>)<sub>2</sub></b> | Te-Cl   | 0.063 | +0.080 | -0.017 | -0.054 | +0.037 |
|                                                                   | Te-C    | 0.124 | -0.054 | -0.071 | -0.129 | +0.058 |
|                                                                   | Te...Cl | 0.008 | +0.021 | +0.001 | -0.004 | +0.005 |
|                                                                   | Cl...Cl | 0.006 | +0.016 | +0.000 | -0.003 | +0.004 |
|                                                                   | Te...Te | 0.009 | +0.025 | +0.001 | -0.004 | +0.005 |
|                                                                   |         |       |        |        |        |        |
| <b>(S(CH<sub>3</sub>)Br<sub>4</sub>)<sub>2</sub></b>              | S-Br    | 0.067 | +0.063 | -0.016 | -0.047 | +0.031 |
|                                                                   | S-C     | 0.173 | -0.295 | -0.124 | -0.174 | +0.050 |
|                                                                   | S...Br  | 0.013 | +0.035 | +0.001 | -0.007 | +0.008 |
|                                                                   | Br...Br | 0.004 | +0.008 | +0.000 | -0.002 | +0.002 |
| <b>(Se(CH<sub>3</sub>)Br<sub>4</sub>)<sub>2</sub></b>             | Se-Br   | 0.063 | +0.051 | -0.015 | -0.044 | +0.028 |
|                                                                   | Se-C    | 0.151 | -0.218 | -0.102 | -0.149 | +0.047 |
|                                                                   | Se...Br | 0.014 | +0.037 | +0.001 | -0.007 | +0.008 |
|                                                                   | Br...Br | 0.004 | +0.008 | +0.000 | -0.002 | +0.002 |
| <b>(Te(CH<sub>3</sub>)Br<sub>4</sub>)<sub>2</sub></b>             | Te-Br   | 0.058 | +0.050 | -0.015 | -0.042 | +0.027 |
|                                                                   | Te-C    | 0.121 | -0.047 | -0.068 | -0.125 | +0.057 |
|                                                                   | Te...Br | 0.013 | +0.029 | +0.001 | -0.006 | +0.007 |
|                                                                   | Br...Br | 0.003 | +0.008 | +0.000 | -0.001 | +0.002 |
|                                                                   |         |       |        |        |        |        |
| <b>(S(CH<sub>3</sub>)I<sub>4</sub>)<sub>2</sub></b>               | S-I     | 0.051 | +0.053 | -0.010 | -0.031 | +0.022 |
|                                                                   | S-C     | 0.169 | -0.279 | -0.119 | -0.168 | +0.049 |
|                                                                   | S...I   | 0.013 | +0.033 | +0.001 | -0.006 | +0.007 |
|                                                                   | I...I   | 0.004 | +0.008 | +0.000 | -0.001 | +0.002 |
| <b>(Se(CH<sub>3</sub>)I<sub>4</sub>)<sub>2</sub></b>              | Se-I    | 0.051 | +0.041 | +0.010 | -0.030 | +0.020 |
|                                                                   | Se-C    | 0.146 | -0.193 | +0.096 | -0.143 | +0.048 |
|                                                                   | Se...I  | 0.015 | +0.033 | -0.001 | -0.007 | +0.008 |
|                                                                   | I...I   | 0.004 | +0.008 | -0.000 | -0.001 | +0.002 |
| <b>(Te(CH<sub>3</sub>)I<sub>4</sub>)<sub>2</sub></b>              | Te-I    | 0.048 | +0.030 | +0.010 | -0.028 | +0.018 |
|                                                                   | Te-C    | 0.117 | -0.033 | +0.064 | -0.120 | +0.056 |
|                                                                   | Te...I  | 0.014 | +0.029 | -0.000 | -0.006 | +0.007 |
|                                                                   | I...I   | 0.004 | +0.007 | -0.000 | -0.001 | +0.002 |
